# Supplementary material for: Rationale and design for studying organisation of care for intra-arterial thrombectomy in the Netherlands: simulation modelling study
Source: PubMed Central journal article supplement (PMC6955572; doi:10.1136/bmjopen-2019-032754), 2020-01-07

## Supplementary files

**Table S1.** Overview of data collection [Table S1.docx] – supplementary material for “Rationale and design of a simulation modelling approach for intra-arterial thrombectomy in the Netherlands” by Lahr M.M. et al.

**Table 1.** Overview of data collection.

| Item                                     | Description                                                                                     | Source             |
|------------------------------------------|-------------------------------------------------------------------------------------------------|--------------------|
| <u>Prehospital items</u>                 |                                                                                                 |                    |
| Symptom onset                            | Exact time of stroke onset, last seen well or symptoms noticed                                  | CRF                |
| Mode of referral                         | Initial call for help directed at either the GP, 911 emergency services or via self-transport   | Ambulance database |
| Time first 911 call                      | Moment of first 911 call as documented at the control centre of the regional ambulance service  | Ambulance database |
| Time second 911 call†                    | Moment of second 911 call as documented at the control centre of the regional ambulance service | Ambulance database |
| Time departure ambulance patient         | Moment of ambulance departure in the direction of the patient                                   | Ambulance database |
| Time departure ambulance hospital        | Moment of ambulance departure in the direction of the PSC for transfer to the CSC               | Ambulance database |
| Time ambulance arrival patient           | Moment of ambulance arrival at the location of the patient                                      | Ambulance database |
| Time ambulance arrival first hospital    | Moment of ambulance arrival at the first hospital                                               | Ambulance database |
| Time ambulance arrival second hospital†  | Moment of ambulance arrival at the second hospital                                              | Ambulance database |
| Time ambulance arrival PSC†              | Moment of ambulance arrival at the PSC to transfer a patient to the CSC                         | Ambulance database |
| Procedures at location patient           | All procedures performance by ambulance personnel at the location of the patient                | Ambulance database |
| Postal code patient                      | Exact geographic location of the patient                                                        | Ambulance database |
| Postal code hospital                     | Exact geographical location of the destination hospital                                         | Ambulance database |
| <u>Intrahospital items</u>               |                                                                                                 |                    |
| Time of arrival ER first hospital        | Moment of patient entry into the hospital electronic system                                     | CRF                |
| Time of arrival ER intervention hospital | Moment of patient entry into the hospital electronic system                                     | CRF                |
| Time of CT scan first hospital           | Moment of CT scan performance in the first hospital                                             | CRF                |
| Time of CT scan second hospital          | Moment of CT scan performance in the second hospital                                            | CRF                |
| Time of CTA scan first hospital          | Moment of CTA scan performance in the first hospital                                            | CRF                |
| Time of CTA scan second hospital         | Moment of CTA scan performance in the second hospital                                           | CRF                |

|                                       |                                              |     |
|---------------------------------------|----------------------------------------------|-----|
| Time of IV alteplase bolus (if given) | Moment of intravenous thrombolysis           | CRF |
| Time of angiosuite arrival            | Moment of patient arrival at the angiosuite  | CRF |
| Time groin puncture                   | Moment of groin puncture                     | CRF |
| Time device attempt                   | Moment of device attempt                     | CRF |
| Time recanalisation                   | Time of recanalisation                       | CRF |
| Time of end procedure                 | Moment of sheath withdrawal/end of procedure | CRF |

CRF indicates case report form; PSC, primary stroke centre; CSC, comprehensive stroke centre; CT, computed tomography; CTA, computed tomography angiogram.

†In case of intravenous thrombolysis at the primary stroke centre followed by intra-arterial thrombectomy at the comprehensive stroke centre (drip-and-ship approach).

**Figure S1.** Overview of IAT centres and ambulance services [Supplementary figure S1.tiff] - supplementary material for “Rationale and design of a simulation modelling approach for intra-arterial thrombectomy in the Netherlands” by Lahr M.M. et al.

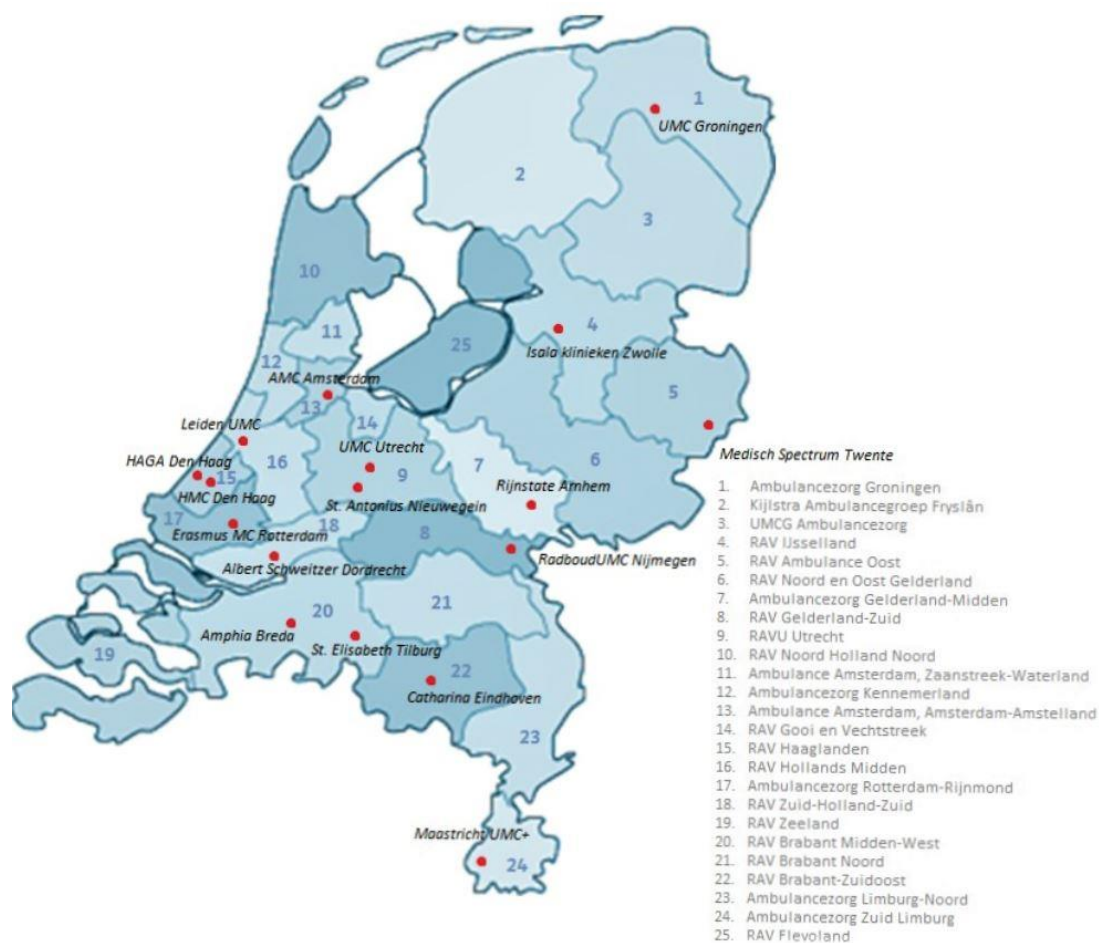

Supplement: bmjopen-2019-032754supp001.pdf [file bmjopen-2019-032754supp001.pdf]
